# Supplementary material for: Scalable electrochromic nanopixels using plasmonics
Source: PubMed Central journal article supplement — Sci Adv. 2019 May 10;5(5):eaaw2205. doi: 10.1126/sciadv.aaw2205 (PMC6510554; doi:10.1126/sciadv.aaw2205), 2019-05-10
Supplement: aaw2205_SM.pdf [file aaw2205_SM.pdf]

## Supplementary Materials for

### Scalable electrochromic nanopixels using plasmonics

Jialong Peng, Hyeon-Ho Jeong, Qianqi Lin, Sean Cormier, Hsin-Ling Liang, Michael F. L. De Volder, Silvia Vignolini, Jeremy J. Baumberg\*

\*Corresponding author. Email: [jjb12@cam.ac.uk](mailto:jjb12@cam.ac.uk)

Published 10 May 2019, *Sci. Adv.* **5**, eaaw2205 (2019)  
DOI: 10.1126/sciadv.aaw2205

#### The PDF file includes:

- Fig. S1. FDTD simulations of Au NPs and *e*NPoMs.
- Fig. S2. Electrochemical cell.
- Fig. S3. PANI coating on Au NPs with thickness control.
- Fig. S4. FDTD numerical simulation of *e*NPoM for different redox states in the gap.
- Fig. S5. Electrochemical analysis of *e*NPoMs.
- Fig. S6. Reversible optical switching of *e*NPoMs.
- Fig. S7. *e*NPoM metasurfaces.
- Fig. S8. Angular dependence of *e*NPoM metasurfaces.
- Fig. S9. Power density of various displays.
- Table S1. Comparison of electrochromic plasmonic reflective devices.

#### Other Supplementary Material for this manuscript includes the following:

(available at [advances.sciencemag.org/cgi/content/full/5/5/eaaw2205/DC1](https://advances.sciencemag.org/cgi/content/full/5/5/eaaw2205/DC1))

Movie S1 (.mov format). Matrix ( $6 \times 6$ ) of the DF scattering images of the *e*NPoMs as a function of time during CV cycle in the range of  $-0.2$  to  $0.6$  V (versus Ag/AgCl) with a scan rate of 50 mV/s.

Movie S2 (.mov format). DF scattering images of four different particles (in row) of four different *e*NPoMs composed of 11-, 13-, 18-, and 20-nm PANI thicknesses as a function of time during CV cycle in the range of  $-0.2$  to  $0.6$  V (versus Ag/AgCl) with a scan rate of 50 mV/s.

Movie S3 (.mov format). DF scattering images of the *e*NPoM metasurfaces as a function of time during CV cycle in the range of  $-0.2$  to  $0.6$  V (versus Ag/AgCl) with a scan rate of 50 mV/s.

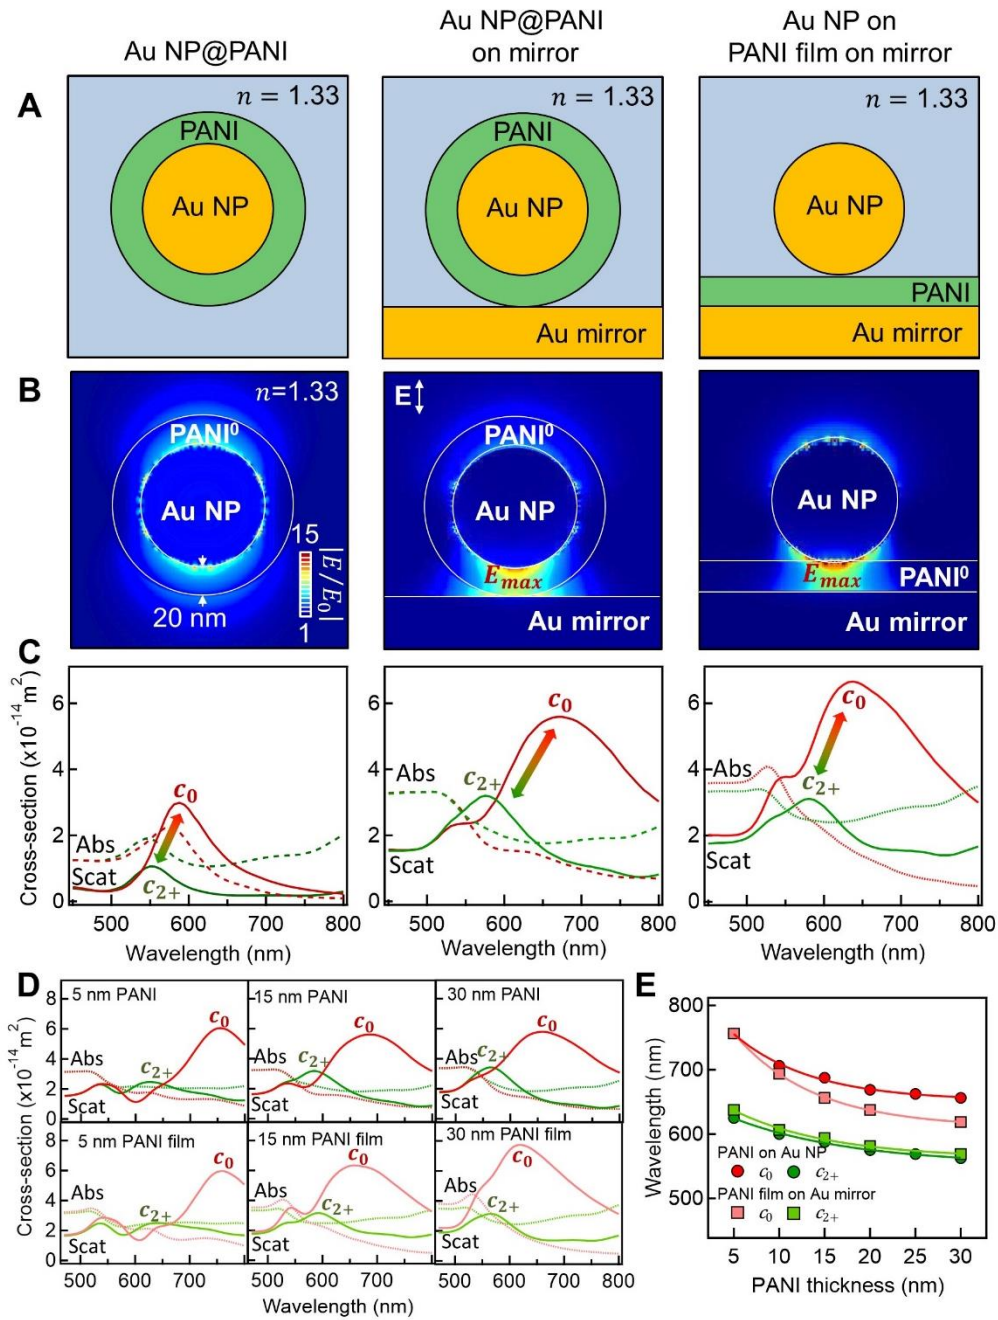

**Fig. S1. FDTD simulations of Au NPs and eNPoMs.** (A) Schematics and (B) optical near-field enhancements of Au NPs coated with a 20nm PANI shell layer (left panel) and two different eNPoM geometries (middle: PANI shell surrounding Au NP, right: PANI layer only on Au mirror). (C) Corresponding simulated optical scattering (solid lines) and absorption spectra (dotted lines) with reduced (red) and oxidized (green) PANI. (D) Simulated optical scattering (solid lines) and absorption spectra (dotted lines) of the two eNPoMs vs wavelength for different PANI thicknesses (5 nm to 30 nm from left to right). (E) Corresponding coupled plasmon mode peaks as a function of PANI thickness.

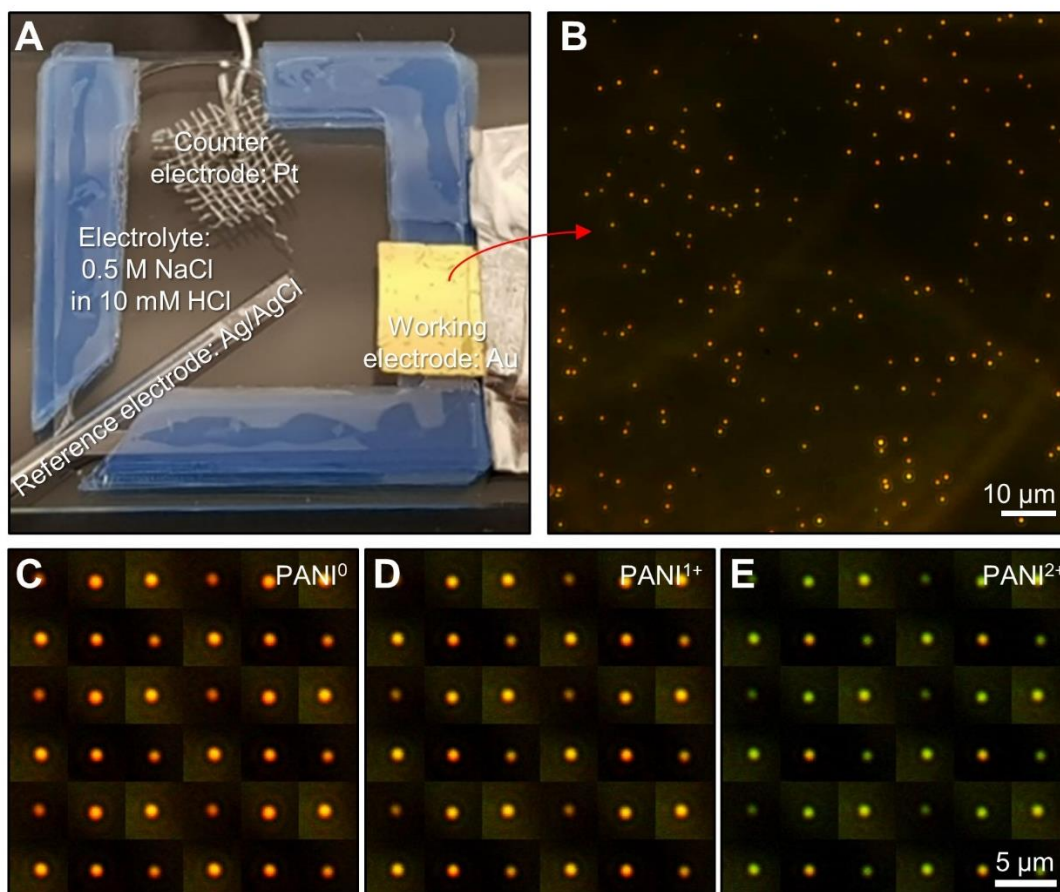

**Fig. S2. Electrochemical cell.** (A) Image of electrochemical cell with *e*NPOMs on mirror layer also used as working electrode. Photo credit: J. Peng & H.-H. Jeong, University of Cambridge. (B) Large-area DF scattering image of sparse *e*NPOMs. DF scattering images of *e*NPOMs at (C) PANI<sup>0</sup> (full reduction), (D), PANI<sup>1+</sup> (half oxidation), and (E) PANI<sup>2+</sup> (full oxidation).

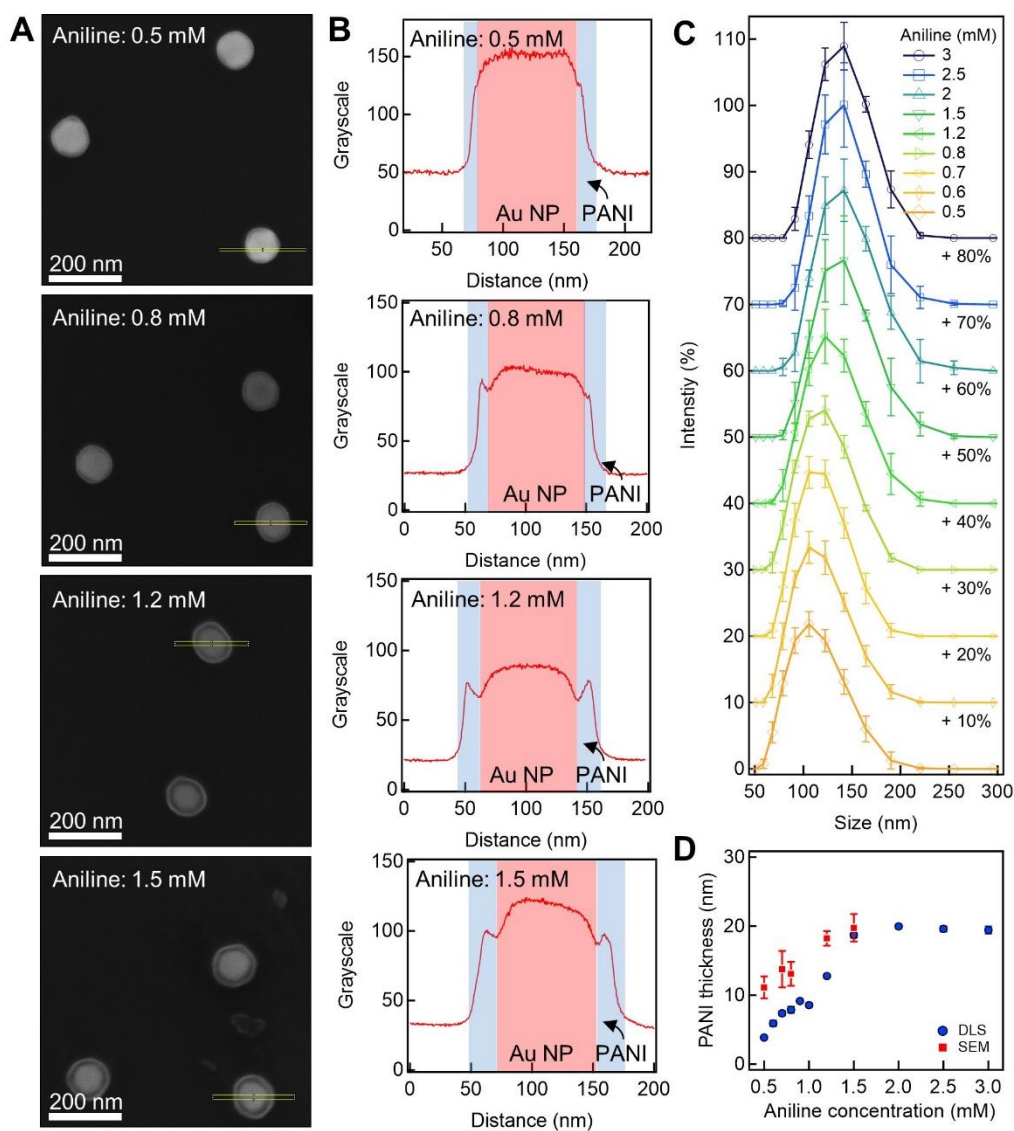

**Fig. S3. PANI coating on Au NPs with thickness control.** (A) Scanning electron microscope (SEM) images of 80 nm Au NPs coated with different PANI thickness. (B) Corresponding cross-sections and (C) dynamic light scattering (DLS) spectra, showing increasing hydrodynamic diameter of the NPs for increasing monomer concentration in the coating process. (D) PANI thickness measured by SEM (red squares) and DLS (blue circles) as a function of aniline monomer concentration.

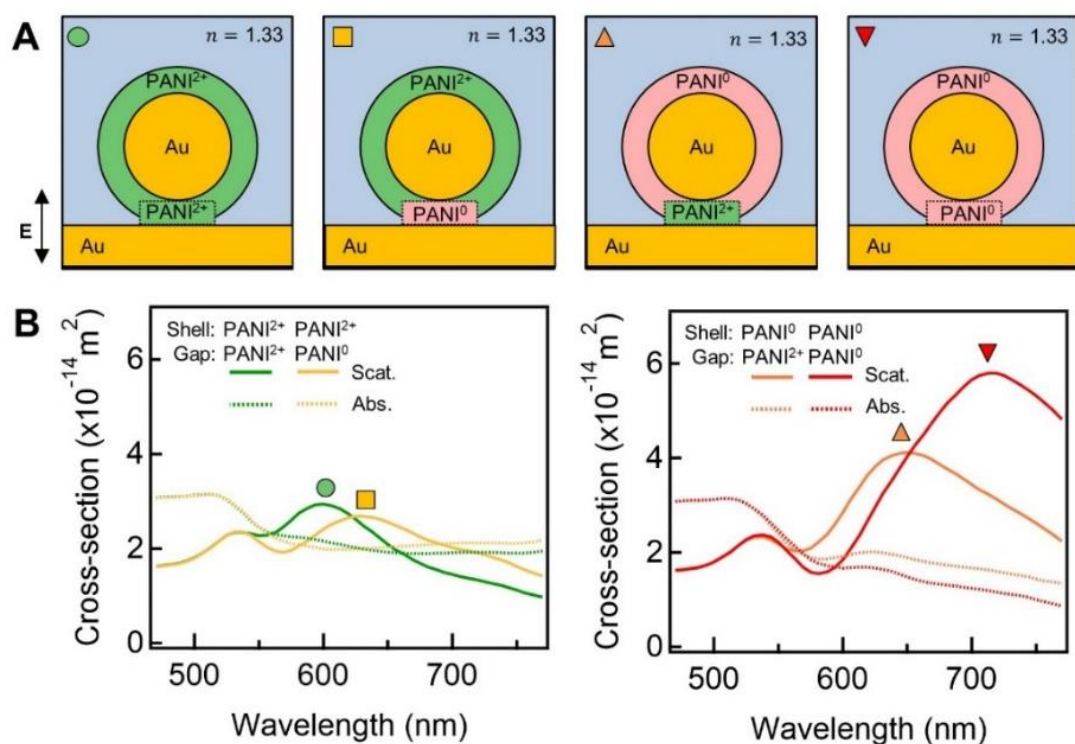

**Fig. S4. FDTD numerical simulation of *e*NPoM for different redox states in the gap.** (A) Schematic NPoMs for different situations of redox within the PANI shell (green circle: PANI<sup>2+</sup> shell with PANI<sup>2+</sup> gap, yellow square: PANI<sup>2+</sup> shell with PANI<sup>0</sup> gap, orange upper triangle: PANI<sup>0</sup> shell with PANI<sup>2+</sup> gap, red lower triangle: PANI<sup>0</sup> shell with PANI<sup>0</sup> gap). (B) Corresponding scattering (solid line) and absorption spectra (dotted line) vs wavelength. Partial changes in the PANI redox switching through the shell volume will lead to smaller changes in the effective refractive index surrounding the nanoparticle, so reducing the corresponding color dynamic range.

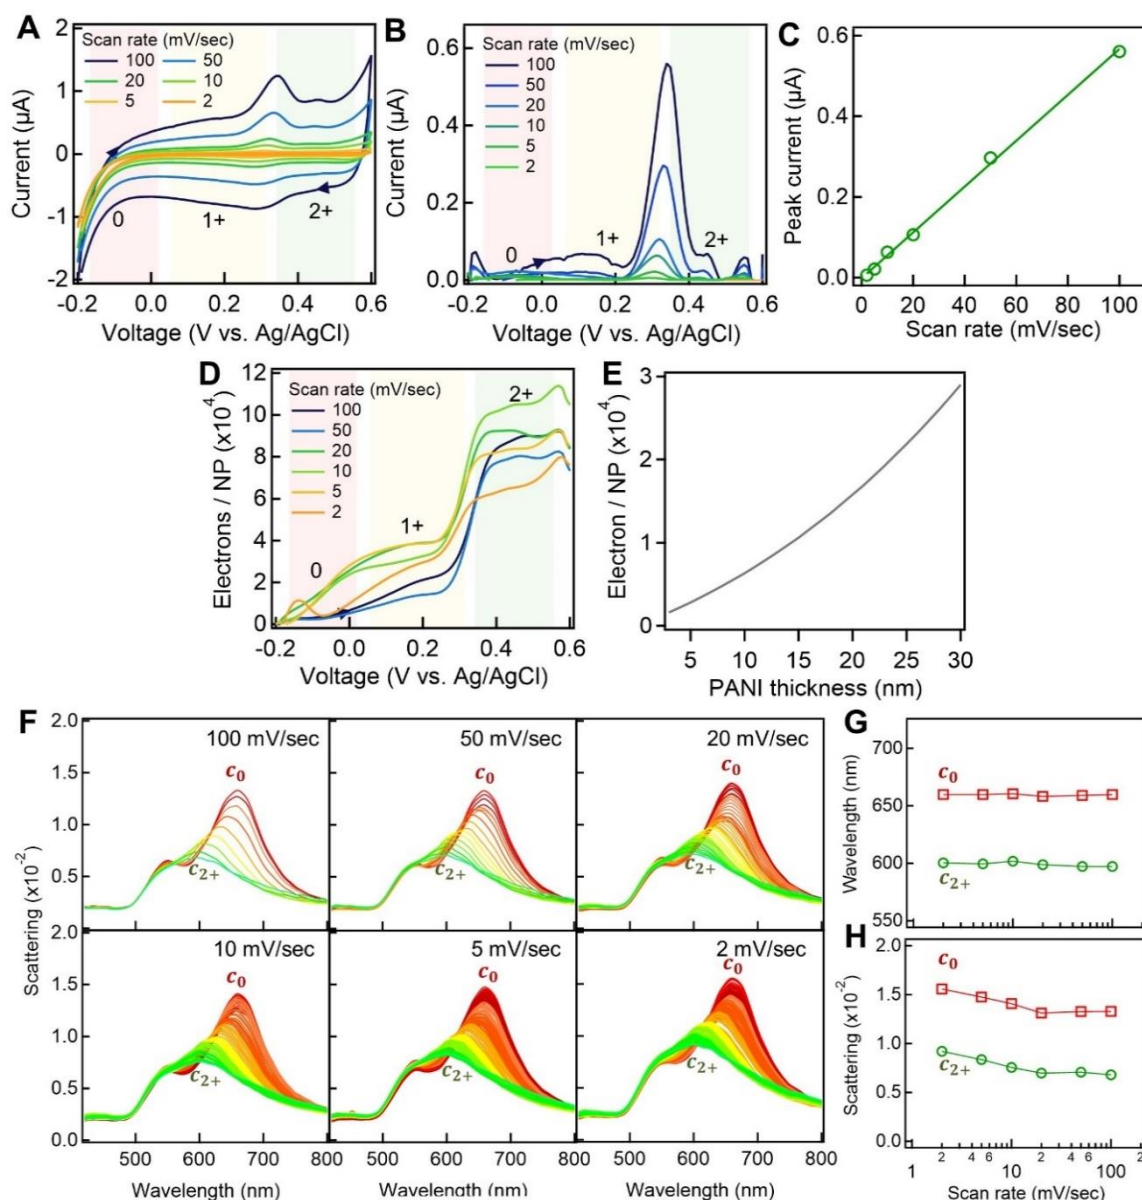

**Fig. S5. Electrochemical analysis of eNPOMs.** (A) CV curves of eNPOMs vs scan rate from 2 to 100 mV/sec, and (B) after background correction. (C) Peak current in CV vs scan rate from 2 to 100 mV/sec. (D) Charge transferred via the gap vs applied potential. (E) Estimated electron transfer per eNPOM vs PANI thickness. Molecular weight and density of PANI are 0.3 mg/mol and 1.25 g/mL (34). (F) DF scattering spectra of a single eNPOM for different scan rates shown, and (G) their corresponding peak wavelengths and (H) intensities as a function of scan rate.

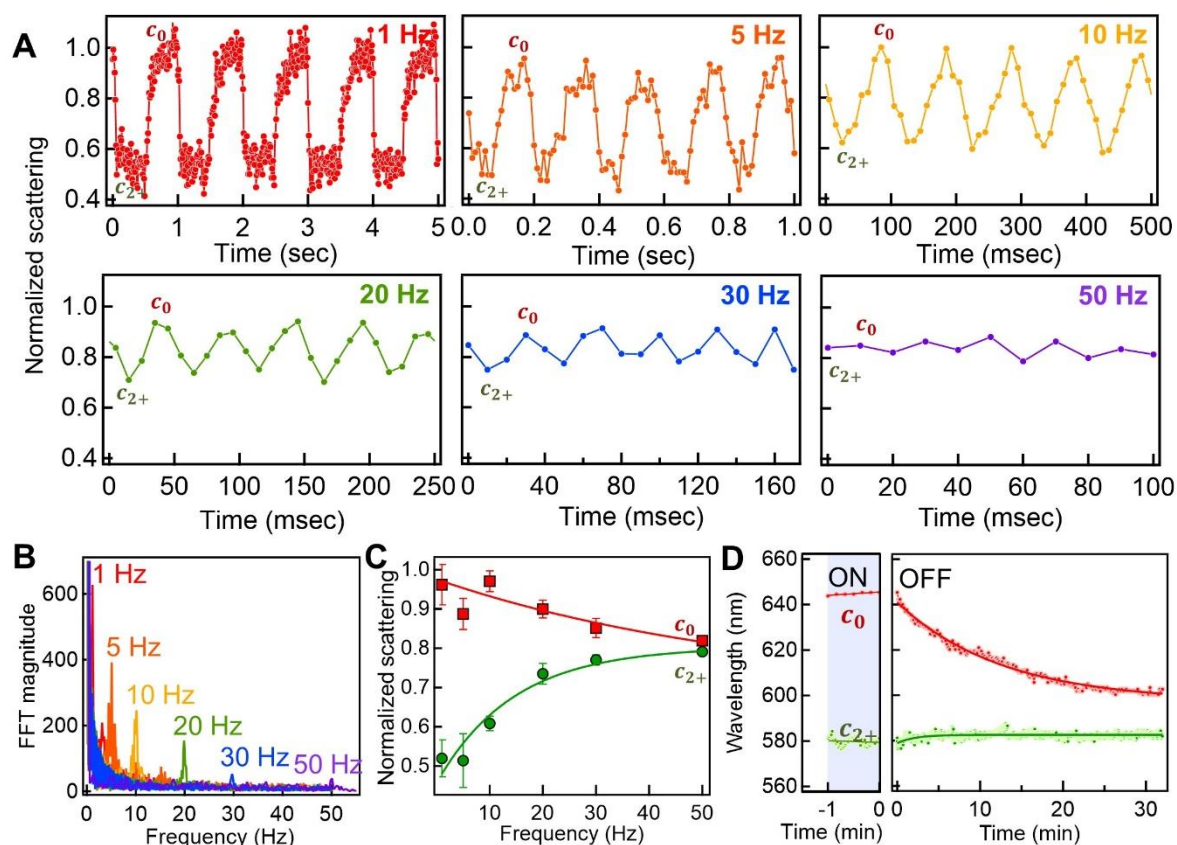

**Fig. S6. Reversible optical switching of eNPOMs.** (A) DF scattering intensities of an eNPOM at the peak wavelength  $c_0$  in response to square waves at 1 (red), 5 (orange), 10 (yellow), 20 (green), 30 (blue), and 50 Hz (violet). (B) Corresponding FFT analysis and (C) optical contrast vs frequency. (D) Retention of eNPOM redox state. Left panel shows wavelength positions of  $c_0$  and  $c_{2+}$  for the eNPOM at -0.2 and 0.6 V. Right panel shows corresponding peak shifts after switching off the external potential.

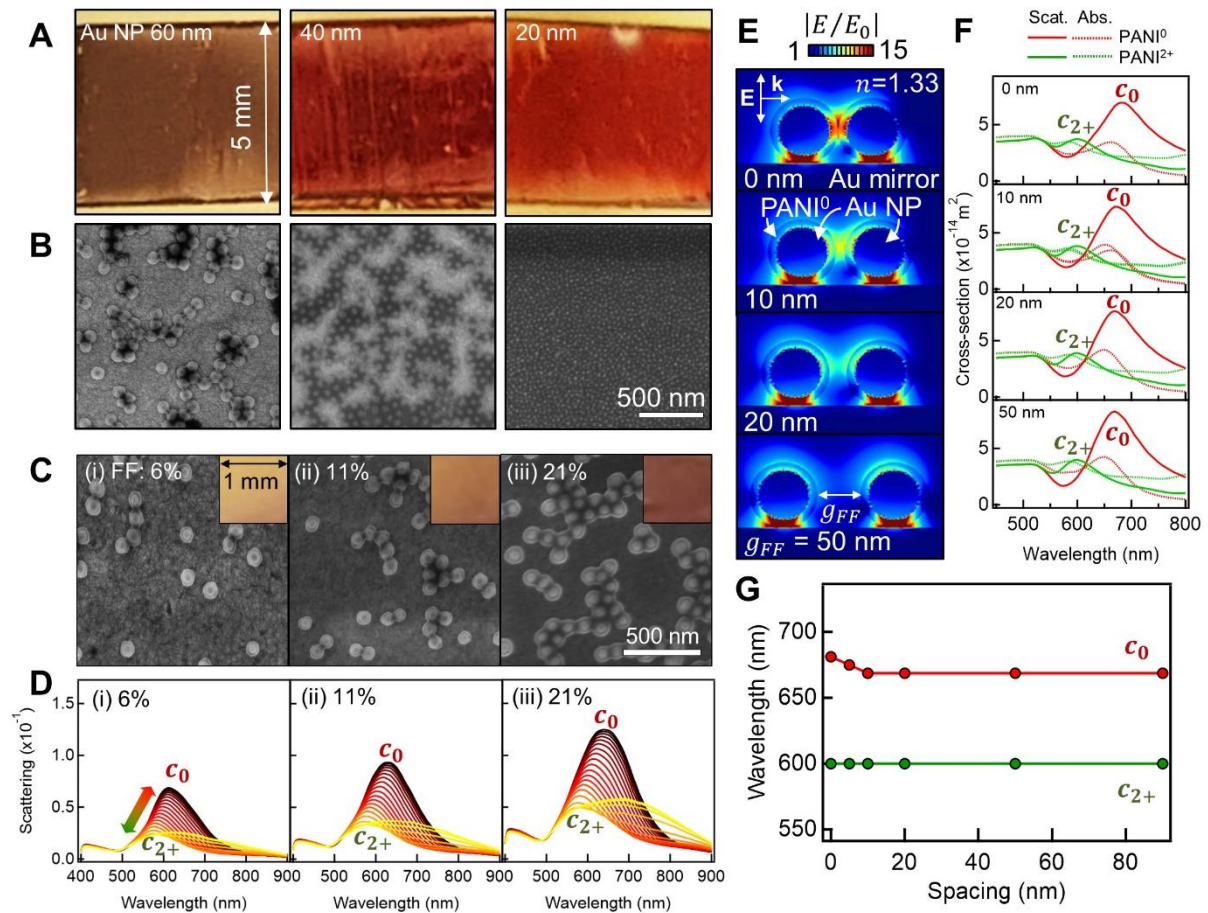

**Fig. S7. eNPoM metasurfaces.** (A) Images of eNPoM metasurfaces composed of 60, 40, and 20 nm Au NPs (from left to right) (Photo credit: J. Peng & H.-H. Jeong, University of Cambridge) and (B) their corresponding SEM images. (C) SEM images of the eNPoM metasurfaces composed of 60 nm Au NPs with different fill fraction from 6 to 21% (from left to right) and (D) their corresponding DF scattering spectra vs voltage applied from  $-0.3 \leftrightarrow 0.8$  V. (E) Optical near-field enhancements of two eNPoM vs lateral separation. (F) Corresponding simulated optical scattering (solid lines) and absorption spectra (dotted lines) with reduced (red) and oxidized (green) PANI. (G) Corresponding coupled plasmon mode peaks vs lateral separation.



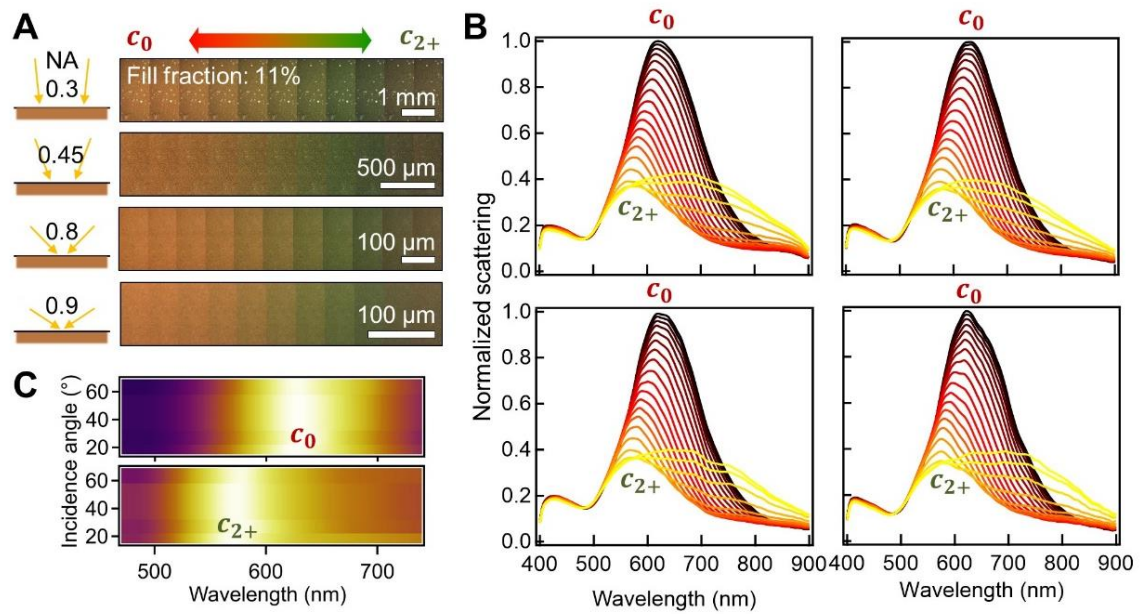

**Fig. S8. Angular dependence of  $e\text{NPOm}$  metasurfaces.** (A) DF images of the  $e\text{NPOm}$  metasurfaces at numerical apertures of 0.3, 0.45, 0.8, and 0.9 vs voltage applied from -0.3  $\leftrightarrow$  0.8 V. (B) Corresponding DF scattering spectra, and (C) 2D maps (top:  $c_{2+}$ , bottom:  $c_0$ ) vs incident angle of the light.

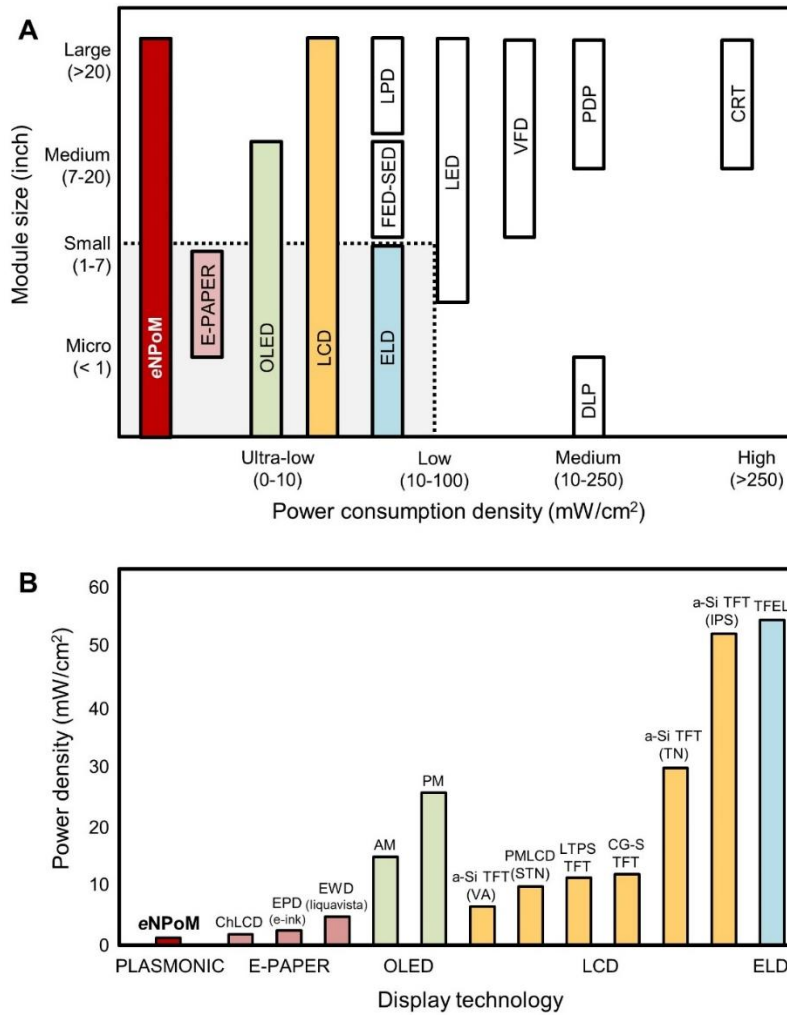

**Fig. S9. Power density of various displays (35).** (A) Comparison of displays against module size and power consumption. (B) Power density of displays. Electronic paper (E-PAPER): electrophoretic display (EPD), electro-wetting display (EWD), cholesteric LCD (ChLCD), organic light-emitting display (OLED): passive matrix (PM), active matrix (AM), liquid crystal display (LCD): amorphous silicon (a-Si), continuous grain silicon (CGS), low temperature polycrystalline silicon (LTPS), twisted nematic (TN), super TN (STN), vertical alignment (VA), in-plane switching (IPS), thin film transistor (TFT), electroluminescent display (ELD): thin film electroluminescent (TFEL), field emission display (FED), surface-conduction electron-emitter display (SED), laser phosphor display (LPD), light-emitting diode (LED), vacuum fluorescent display (VFD), digital light processing (DLP), plasma display panel (PDP), cathode ray tube (CRT).

**Table S1. Comparison of electrochromic plasmonic reflective devices.**

| Type                             | Color generation | Color Switching           | Single unit area (nm <sup>2</sup> ) | Switch time (ms) | Long-term stability | Method                                  | Ref        |
|----------------------------------|------------------|---------------------------|-------------------------------------|------------------|---------------------|-----------------------------------------|------------|
| eNPoM metasurfaces               | Single Pixel     | Dynamic (578 nm – 642 nm) | ~11310                              | 30               | >3 months           | Self-assembly (solution process)        | This study |
| Nano-slits + conductive polymers |                  |                           | ~57600                              | < 10             |                     | FIB, sputtering                         | (12)       |
| MINs with conductive polymers    | RGB combinations | On-off                    | >102400                             | 200 - 1000       | unreported          | Self-assembly, ALD, evaporation         | (10, 11)   |
| Al MIMs with LC                  |                  |                           | ~90000                              | ~30              |                     | NIL (with EBL), evaporation, LC coating | (9)        |

\*nanoimprint lithography (NIL), e-beam lithography (EBL), atomic layer deposition (ALD), polypyrrole (PPy), focused ion beam (FIB), liquid crystal (LC), metal-insulator-metal (MIM), metal-insulator-nanohole (MIN).

### Supplementary Information

#### Estimate of charge transferred per cycle:

The volume of the PANI shell (thickness  $t$ ) per NP (diameter  $D$ ) is given by

$$V_{PANI} = \frac{4}{3}\pi \left[ \left( \frac{D}{2} + t \right)^3 - \left( \frac{D}{2} \right)^3 \right]$$

which given the density of PANI  $\rho=1.25 \text{ g/cm}^3$  and molecular weight of each unit  $M_w=0.3 \text{ mg/mol}$  implies  $2 \times 10^4$  electrons per NP are needed for each individual redox step. This compares with  $3 \times 10^4$  electrons found from the experimental CV data.
